# Supplementary material
Source: PubMed Central journal article supplement (PMC6648447)
Supplement: ao8b03258_si_001.pdf [file ao8b03258_si_001.pdf]

Supplementary Information

# Effective Estimation of Ligand-Binding Affinity using Biased Sampling Method

Son Tung Ngo,<sup>a,b,\*</sup> Khanh B. Vu,<sup>c</sup> Le Minh Bui,<sup>c</sup> and Van V. Vu<sup>c\*</sup>

<sup>a</sup>Laboratory of Theoretical and Computational Biophysics, Ton Duc Thang University, Ho Chi Minh

City, Vietnam,

<sup>b</sup>Faculty of Applied Sciences, Ton Duc Thang University, Ho Chi Minh City, Vietnam,

<sup>c</sup>NTT Hi-Tech Institute, Nguyen Tat Thanh University, Ho Chi Minh City, Vietnam.

\*Email: [ngosontung@tdtu.edu.vn](mailto:ngosontung@tdtu.edu.vn); [vanvu@ntt.edu.vn](mailto:vanvu@ntt.edu.vn)

**Table S1.** List of ligands and their structure

| N#    | Complexes | Protein | Ligand                                                                               |
|-------|-----------|---------|--------------------------------------------------------------------------------------|
| 1     | 1AU0      | CTSK    | 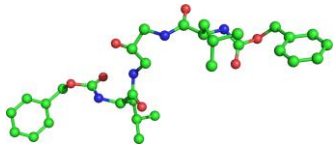   |
| 2     | 1AU2      | CTSK    |    |
| 3     | 1MEM      | CTSK    |    |
| 4     | 1NLJ      | CTSK    |   |
| 5     | 2FTD      | CTSK    |  |
| <hr/> |           |         |                                                                                      |
| 6     | 1GU1      | DHQase  |  |
| 7     | 2C4W      | DHQase  |  |

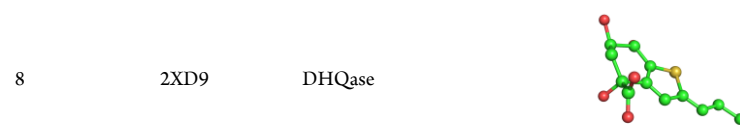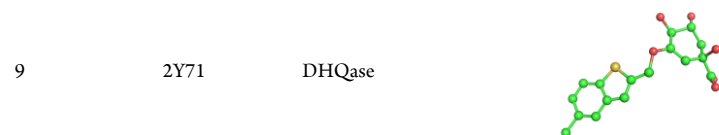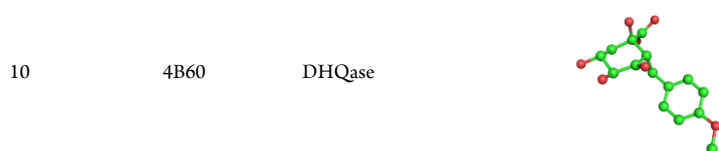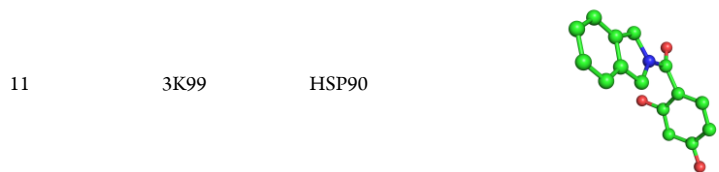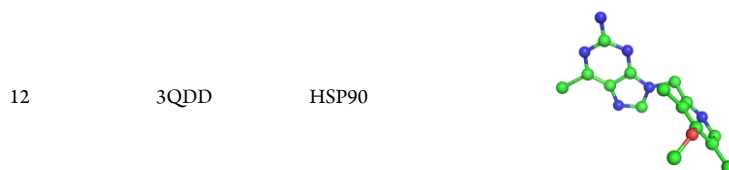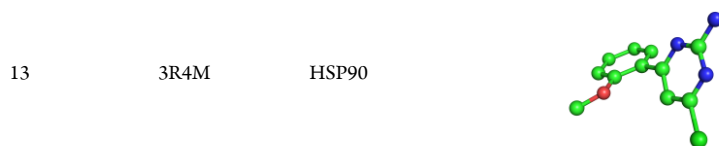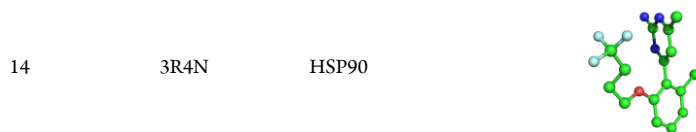

|    |      |       |                                                                                      |
|----|------|-------|--------------------------------------------------------------------------------------|
| 15 | 3RLQ | HSP90 | 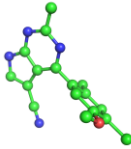   |
| 16 | 1FOR | FXa   |    |
| 17 | 1KSN | FXa   |    |
| 18 | 1NFU | FXa   |   |
| 19 | 2J34 | FXa   |  |
| 20 | 1FJS | FXa   |  |

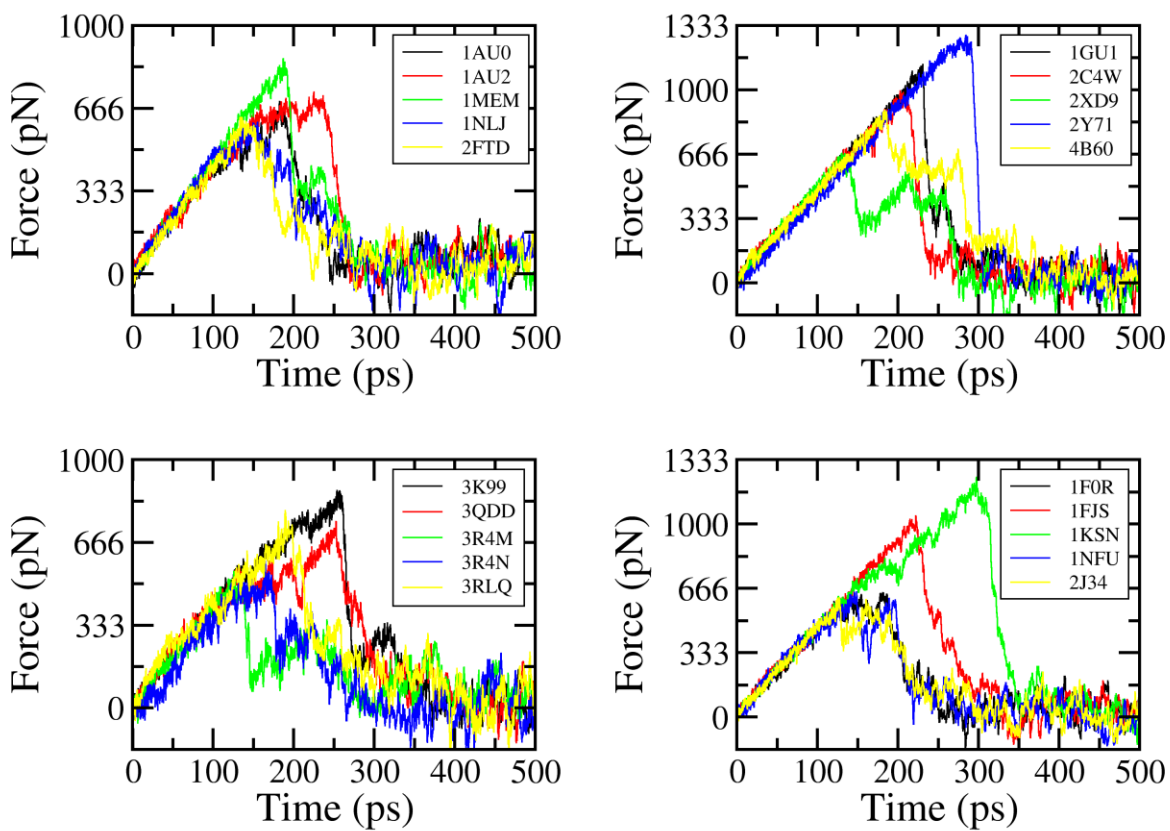

**Figure S1.** The recorded values of pulling force over FPL simulations

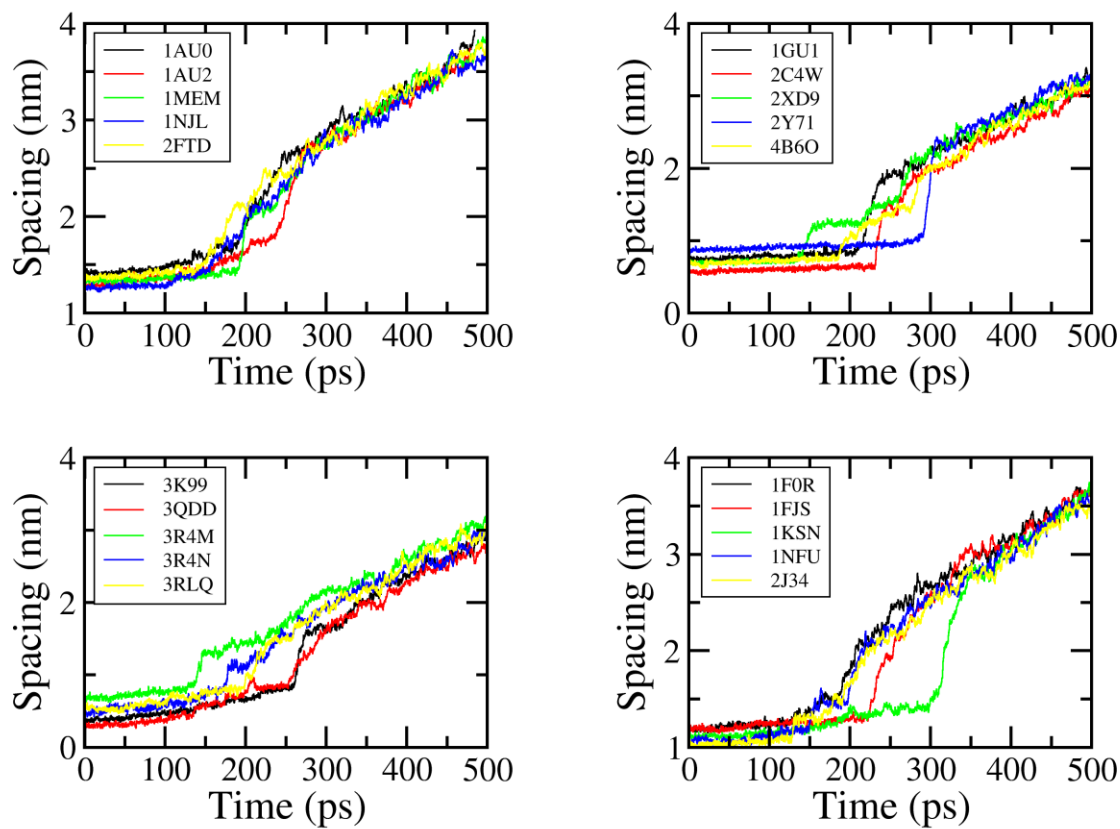

**Figure S2.** The displacement of the ligand center of mass during FPL simulations
